# Supplementary material for: XB2Bi2 (X = Si, Ge, Sn, Pb): Penta-Atomic Planar Tetracoordinate Si/Ge/Sn/Pb Clusters with 20 Valence Electrons
Source: MDPI journal article supplement (doi:10.3390/ijms25052819), 2024-02-29

## SUPPLEMENTARY INFORMATION

### **$\text{XB}_2\text{Bi}_2$ (X = Si, Ge, Sn, Pb): Penta-atomic Planar Tetracoordinate Si/Ge/Sn/Pb Clusters with 20 Valence Electrons**

Yan-Xia Jin and Jin-Chang Guo\*

*Key Laboratory of Materials for Energy Conversion and Storage of Shanxi Province, Institute of Molecular  
Science, Shanxi University, Taiyuan, Shanxi 030006, China.*

E-mail: guojc@sxu.edu.cn

#### Table of Contents

- Table S1.** Cartesian coordinates of optimized structures of the **1–4E** in the text.
- Table S2.** Orbital composition analysis of canonical molecular orbitals (CMOs) of the global-minimum structure **1** ( $C_{2v}$ ,  $^1A_1$ ) of  $\text{SiB}_2\text{Bi}_2$  cluster.
- Figure S1.** Optimized GM structures of  $\text{XB}_2\text{Bi}_2$  (X = Si, Ge, Sn, Pb) clusters with bond distances (in Å) at the MP2/def2-TZVP level. The lowest vibrational frequencies are shown (in  $\text{cm}^{-1}$ ).
- Figure S2.** HOMO, LUMO, and HOMO–LUMO gap values of  $\text{XB}_2\text{Bi}_2$  (X = Si, Ge, Sn, Pb) at the PBE0-D3(BJ)/def2-TZVP level. Those of ptC  $\text{CB}_2\text{Bi}_2$  are also listed.
- Figure S3.**  $\text{ELF}_\sigma$  (a) and  $\text{ELF}_\pi$  (b) pictures of ptSi  $\text{SiB}_2\text{Bi}_2$ .
- Figure S4.** Color-filled maps of (a)  $\text{ICSS}(0)_{zz}$  and (b)  $\text{ICSS}(1)_{zz}$  (in ppm) for **2–4** clusters. Positive values indicate aromaticity. 0 and 1 in parentheses represent the height above the molecular planes (in Å).
- Figure S5.** Simulated infrared spectra of **2–4** clusters at the PBE0-D3(BJ)/def2-TZVP level.

**Table S1.** Cartesian coordinates of optimized structures of the **1–4E** in the text.

**1** SiB<sub>2</sub>Bi<sub>2</sub> (*C*<sub>2v</sub>, <sup>1</sup>A<sub>1</sub>)

|    |            |             |             |
|----|------------|-------------|-------------|
| Si | 0.00000000 | 0.00000000  | −0.69264364 |
| B  | 0.00000000 | 0.78509201  | 1.24503740  |
| B  | 0.00000000 | −0.78509201 | 1.24503740  |
| Bi | 0.00000000 | 2.55212806  | −0.01658652 |
| Bi | 0.00000000 | −2.55212806 | −0.01658652 |

**1B** (*C*<sub>s</sub>, <sup>1</sup>A′)

|    |             |             |            |
|----|-------------|-------------|------------|
| Si | −0.94882408 | 1.97728437  | 0.00000000 |
| B  | 0.92192294  | 1.42269341  | 0.00000000 |
| B  | −0.04654403 | 0.08502439  | 0.00000000 |
| Bi | 2.34380697  | −0.15531056 | 0.00000000 |
| Bi | −2.23649803 | −0.26903366 | 0.00000000 |

**1C** (*C*<sub>s</sub>, <sup>1</sup>A′)

|    |             |             |             |
|----|-------------|-------------|-------------|
| Si | 0.49035137  | 2.04064972  | 0.00000000  |
| B  | −1.70690907 | 0.06829469  | 0.00000000  |
| B  | −1.40945243 | 1.62902767  | 0.00000000  |
| Bi | 0.05251138  | −0.22322716 | 1.51142293  |
| Bi | 0.05251138  | −0.22322716 | −1.51142293 |

**1D** (*C*<sub>s</sub>, <sup>1</sup>A′)

|    |             |             |            |
|----|-------------|-------------|------------|
| Si | −3.16275301 | 1.39061380  | 0.00000000 |
| B  | −1.31584304 | 1.82797793  | 0.00000000 |
| B  | 0.25495699  | 1.47664304  | 0.00000000 |
| Bi | −1.27884787 | −0.53173907 | 0.00000000 |
| Bi | 1.87623308  | 0.09810415  | 0.00000000 |

**1E ( $C_s, {}^1A'$ )**

|    |             |             |            |
|----|-------------|-------------|------------|
| Si | 1.43138892  | 2.25199596  | 0.00000000 |
| B  | 0.04388196  | 0.89758792  | 0.00000000 |
| B  | -0.28310599 | -0.72127209 | 0.00000000 |
| Bi | -2.27725401 | -0.05596116 | 0.00000000 |
| Bi | 2.05022600  | -0.33451502 | 0.00000000 |

**2 GeB<sub>2</sub>Bi<sub>2</sub> ( $C_{2v}, {}^1A_1$ )**

|    |            |             |             |
|----|------------|-------------|-------------|
| Ge | 0.00000000 | 0.00000000  | -0.63270333 |
| B  | 0.00000000 | 0.78509201  | 1.30497771  |
| B  | 0.00000000 | -0.78509201 | 1.30497771  |
| Bi | 0.00000000 | 2.55212806  | 0.04335379  |
| Bi | 0.00000000 | -2.55212806 | 0.04335379  |

**2B ( $C_s, {}^1A'$ )**

|    |             |             |             |
|----|-------------|-------------|-------------|
| Ge | 0.18696613  | 1.90797657  | 0.00000000  |
| B  | -1.71776546 | -0.34815627 | 0.00000000  |
| B  | -1.63805844 | 1.23866907  | 0.00000000  |
| Bi | 0.06503737  | -0.39462539 | 1.51142293  |
| Bi | 0.06503737  | -0.39462539 | -1.51142293 |

**2C ( $C_s, {}^1A'$ )**

|    |             |             |            |
|----|-------------|-------------|------------|
| Ge | 0.93697204  | 1.75591295  | 0.00000000 |
| B  | -0.94708287 | 1.28107631  | 0.00000000 |
| B  | -0.04008516 | -0.08643272 | 0.00000000 |
| Bi | -2.42327565 | -0.22607460 | 0.00000000 |
| Bi | 2.12150137  | -0.52287037 | 0.00000000 |

**2D ( $C_s, {}^1A'$ )**

|    |             |            |            |
|----|-------------|------------|------------|
| Ge | -3.01359681 | 0.93725895 | 0.00000000 |
| B  | -1.22760024 | 1.57958290 | 0.00000000 |
| B  | 0.37274913  | 1.40715661 | 0.00000000 |

|                                                                 |             |             |             |
|-----------------------------------------------------------------|-------------|-------------|-------------|
| Bi                                                              | -0.92542555 | -0.76099895 | 0.00000000  |
| Bi                                                              | 2.13879125  | 0.21972204  | 0.00000000  |
| <b>2E</b> ( $C_s, {}^1A'$ )                                     |             |             |             |
| Ge                                                              | 1.46438183  | 1.94856347  | 0.00000000  |
| B                                                               | -0.02479150 | 0.70680685  | 0.00000000  |
| B                                                               | -0.47737378 | -0.88152502 | 0.00000000  |
| Bi                                                              | -2.41338736 | -0.06230811 | 0.00000000  |
| Bi                                                              | 1.87905734  | -0.67842009 | 0.00000000  |
| <b>3</b> SnB <sub>2</sub> Bi <sub>2</sub> ( $C_{2v}, {}^1A_1$ ) |             |             |             |
| Sn                                                              | 0.00000000  | 0.00000000  | 1.24128239  |
| B                                                               | 0.00000000  | 0.79608423  | -1.24018059 |
| B                                                               | 0.00000000  | -0.79608423 | -1.24018059 |
| Bi                                                              | 0.00000000  | 2.69689122  | -0.29917056 |
| Bi                                                              | 0.00000000  | -2.69689122 | -0.29917056 |
| <b>3B</b> ( $C_s, {}^1A'$ )                                     |             |             |             |
| Sn                                                              | 0.10781754  | 2.07980357  | 0.00000000  |
| B                                                               | -1.65212270 | -0.65341558 | 0.00000000  |
| B                                                               | -1.90388277 | 0.91909968  | 0.00000000  |
| Bi                                                              | 0.07463344  | -0.63444939 | -1.51304437 |
| Bi                                                              | 0.07463344  | -0.63444939 | 1.51304437  |
| <b>3C</b> ( $C_s, {}^1A'$ )                                     |             |             |             |
| Sn                                                              | 1.29054355  | 1.89424475  | 0.00000000  |
| B                                                               | -0.10998643 | -0.17542506 | 0.00000000  |
| B                                                               | -1.03243961 | 1.17202512  | 0.00000000  |
| Bi                                                              | 1.91643704  | -1.00275401 | 0.00000000  |
| Bi                                                              | -2.62505207 | -0.19839343 | 0.00000000  |

**3D ( $C_1, {}^1A$ )**

|    |             |             |             |
|----|-------------|-------------|-------------|
| Sn | 1.86824000  | -0.02450800 | -0.06553900 |
| B  | -0.57684400 | -0.53949200 | 1.94660500  |
| B  | 0.46808700  | 0.62735800  | 1.67857000  |
| Bi | -0.91073800 | 1.48914100  | -0.07692100 |
| Bi | -0.92844200 | -1.47022100 | -0.07671300 |

**3E ( $C_s, {}^1A'$ )**

|    |             |             |            |
|----|-------------|-------------|------------|
| Sn | 3.15910817  | -0.63956441 | 0.00000000 |
| B  | -0.54578919 | -1.35498978 | 0.00000000 |
| B  | 1.05753414  | -1.42686307 | 0.00000000 |
| Bi | -2.43143113 | -0.33746760 | 0.00000000 |
| Bi | 0.49752590  | 0.89032887  | 0.00000000 |

**4 PbB<sub>2</sub>Bi<sub>2</sub> ( $C_{2v}, {}^1A_1$ )**

|    |            |             |             |
|----|------------|-------------|-------------|
| Pb | 0.00000000 | 0.00000000  | 1.08732488  |
| B  | 0.00000000 | 0.79608423  | -1.39413810 |
| B  | 0.00000000 | -0.79608423 | -1.39413810 |
| Bi | 0.00000000 | 2.69689122  | -0.45312807 |
| Bi | 0.00000000 | -2.69689122 | -0.45312807 |

**4B ( $C_s, {}^1A'$ )**

|    |             |             |             |
|----|-------------|-------------|-------------|
| Pb | 0.06407749  | 1.82316412  | 0.00000000  |
| B  | -1.65007956 | -0.93899848 | 0.00000000  |
| B  | -1.92800478 | 0.62910386  | 0.00000000  |
| Bi | 0.07612089  | -0.89126497 | -1.51304437 |
| Bi | 0.07612089  | -0.89126497 | 1.51304437  |

**4C ( $C_s, {}^1A'$ )**

|    |             |             |            |
|----|-------------|-------------|------------|
| Pb | 1.29928034  | 1.53072606  | 0.00000000 |
| B  | -0.31185493 | -0.37957771 | 0.00000000 |

|                                          |             |             |             |
|------------------------------------------|-------------|-------------|-------------|
| B                                        | -1.08695072 | 1.05770040  | 0.00000000  |
| Bi                                       | 1.61593793  | -1.41614898 | 0.00000000  |
| Bi                                       | -2.81529889 | -0.13698536 | 0.00000000  |
| <b>4D (C<sub>1</sub>,<sup>1</sup>A)</b>  |             |             |             |
| Pb                                       | 1.86824000  | -0.02450800 | -0.06553900 |
| B                                        | -0.57684400 | -0.53949200 | 1.94660500  |
| B                                        | 0.46808700  | 0.62735800  | 1.67857000  |
| Bi                                       | -0.91073800 | 1.48914100  | -0.07692100 |
| Bi                                       | -0.92844200 | -1.47022100 | -0.07671300 |
| <b>4E (C<sub>s</sub>,<sup>1</sup>A')</b> |             |             |             |
| Pb                                       | -1.73452637 | -1.38043592 | 0.00000000  |
| B                                        | 0.32297867  | -0.35057301 | 0.00000000  |
| B                                        | 1.12268273  | 1.08967496  | 0.00000000  |
| Bi                                       | -1.14601025 | 1.55419306  | 0.00000000  |
| Bi                                       | 2.77255068  | -0.23491311 | 0.00000000  |

**Table S2.** Orbital composition analysis of canonical molecular orbitals (CMOs) of the global-minimum structure **1** ( $C_{2v}$ ,  $^1A_1$ ) of SiB<sub>2</sub>Bi<sub>2</sub> cluster.

| CMO                                                                                           | Si (%)             |              | B <sub>2</sub> (%)          |              | Bi <sub>2</sub> (%)         |              |
|-----------------------------------------------------------------------------------------------|--------------------|--------------|-----------------------------|--------------|-----------------------------|--------------|
|                                                                                               | s/p                | total        | s/p                         | total        | s/p                         | total        |
| 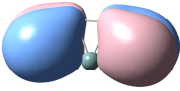<br>HOMO     | 0.00/0.00          | 0.00         | 0.00/13.87                  | 13.87        | 0.00/ <b>84.68</b>          | <b>84.68</b> |
| <br>HOMO-1   | 9.53/ <b>25.53</b> | <b>35.06</b> | 9.30/ <b>45.55</b>          | <b>54.85</b> | 0.00/7.72                   | 7.72         |
| <br>HOMO-2  | 0.00/ <b>27.20</b> | <b>27.20</b> | 4.72/ <b>15.90</b>          | <b>20.62</b> | 0.00/ <b>50.71</b>          | <b>50.71</b> |
| <br>HOMO-3 | 1.87/5.58          | 7.45         | 0.00/ <b>42.34</b>          | <b>42.34</b> | 5.29/ <b>42.75</b>          | <b>48.04</b> |
| <br>HOMO-4 | 0.00/ <b>26.65</b> | <b>26.65</b> | 0.00/ <b>46.37</b>          | <b>46.37</b> | 0.00/ <b>25.53</b>          | <b>25.53</b> |
| <br>HOMO-5 | 0.00/3.33          | 3.33         | <b>19.69</b> /11.82         | <b>31.51</b> | <b>18.63</b> / <b>44.16</b> | <b>62.79</b> |
| <br>HOMO-6 | <b>41.02</b> /4.76 | <b>45.78</b> | <b>21.40</b> /13.64         | <b>35.04</b> | 3.58/13.32                  | <b>16.90</b> |
| <br>HOMO-7 | 2.65/3.01          | 5.66         | <b>15.31</b> / <b>27.25</b> | <b>42.56</b> | <b>43.23</b> /2.93          | <b>46.16</b> |

| CMO                                                                                         | Si (%)            |              | B <sub>2</sub> (%) |              | Bi <sub>2</sub> (%) |              |
|---------------------------------------------------------------------------------------------|-------------------|--------------|--------------------|--------------|---------------------|--------------|
|                                                                                             | s/p               | total        | s/p                | total        | s/p                 | total        |
| 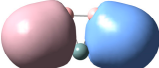<br>HOMO-8 | 0.00/9.34         | 9.34         | 6.37/13.29         | <b>19.66</b> | <b>63.42/0.00</b>   | <b>63.42</b> |
| <br>HOMO-9 | <b>16.83/3.36</b> | <b>20.19</b> | <b>26.04/8.36</b>  | <b>34.40</b> | <b>34.51/3.32</b>   | <b>37.83</b> |



**Figure S1.** Optimized GM structures of  $\text{XB}_2\text{Bi}_2$  ( $\text{X} = \text{Si}, \text{Ge}, \text{Sn}, \text{Pb}$ ) clusters with bond distances (in Å) at the MP2/def2-TZVP level. The lowest vibrational frequencies are shown (in  $\text{cm}^{-1}$ ).

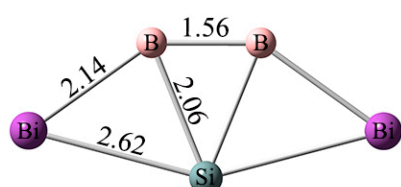

1  $C_{2v}$   $\text{SiB}_2\text{Bi}_2$  ( $^1\text{A}_1$ )  
86.5

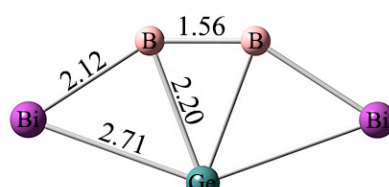

2  $C_{2v}$   $\text{GeB}_2\text{Bi}_2$  ( $^1\text{A}_1$ )  
69.7

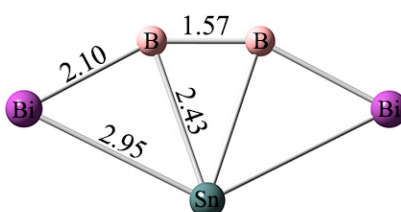

3  $C_{2v}$   $\text{SnB}_2\text{Bi}_2$  ( $^1\text{A}_1$ )  
71.0

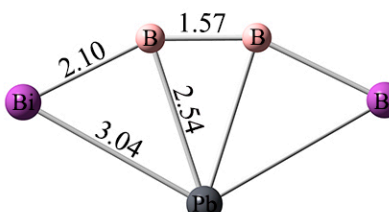

4  $C_{2v}$   $\text{PbB}_2\text{Bi}_2$  ( $^1\text{A}_1$ )  
71.9

**Figure S2.** HOMO, LUMO, and HOMO–LUMO gap values of  $\text{XB}_2\text{Bi}_2$  ( $\text{X} = \text{Si}, \text{Ge}, \text{Sn}, \text{Pb}$ ) at the PBE0-D3(BJ)/def2-TZVP level. Those of ptC  $\text{CB}_2\text{Bi}_2$  are also listed.

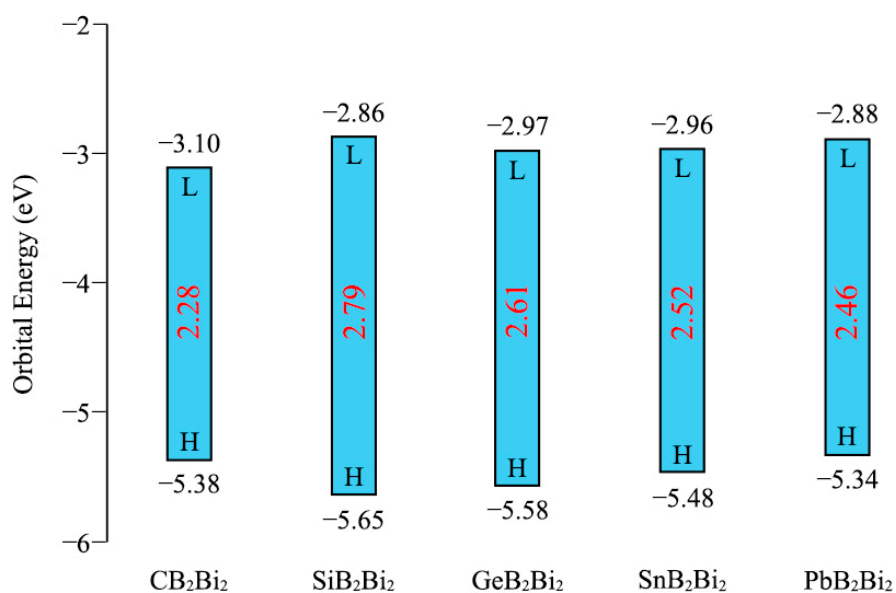

**Figure S3.**  $\text{ELF}_\sigma$  (a) and  $\text{ELF}_\pi$  (b) pictures of ptSi  $\text{SiB}_2\text{Bi}_2$ .

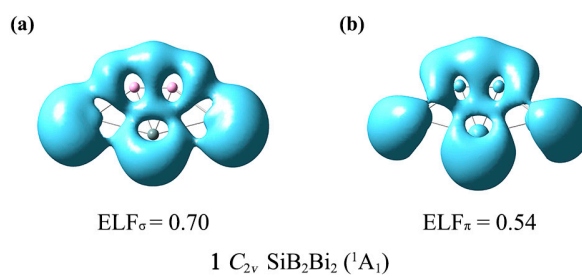

**Figure S4.** Color-filled maps of (a) ICSS(0)<sub>zz</sub> and (b) ICSS(1)<sub>zz</sub> (in ppm) for 2–4 clusters. Positive values indicate aromaticity. 0 and 1 in parentheses represent the height above the molecular planes (in Å).

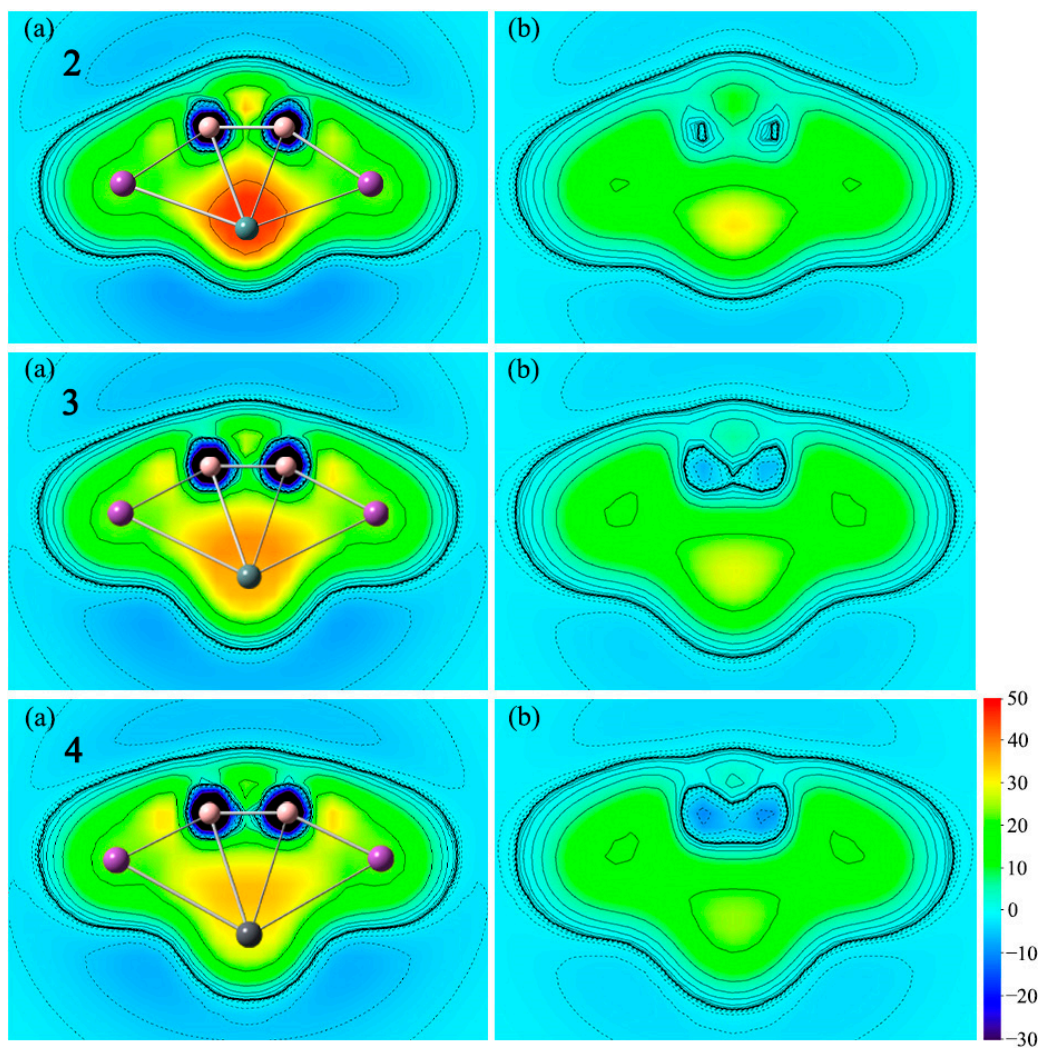

**Figure S5.** Simulated infrared spectra of **2–4** clusters at the PBE0-D3(BJ)/def2-TZVP level.

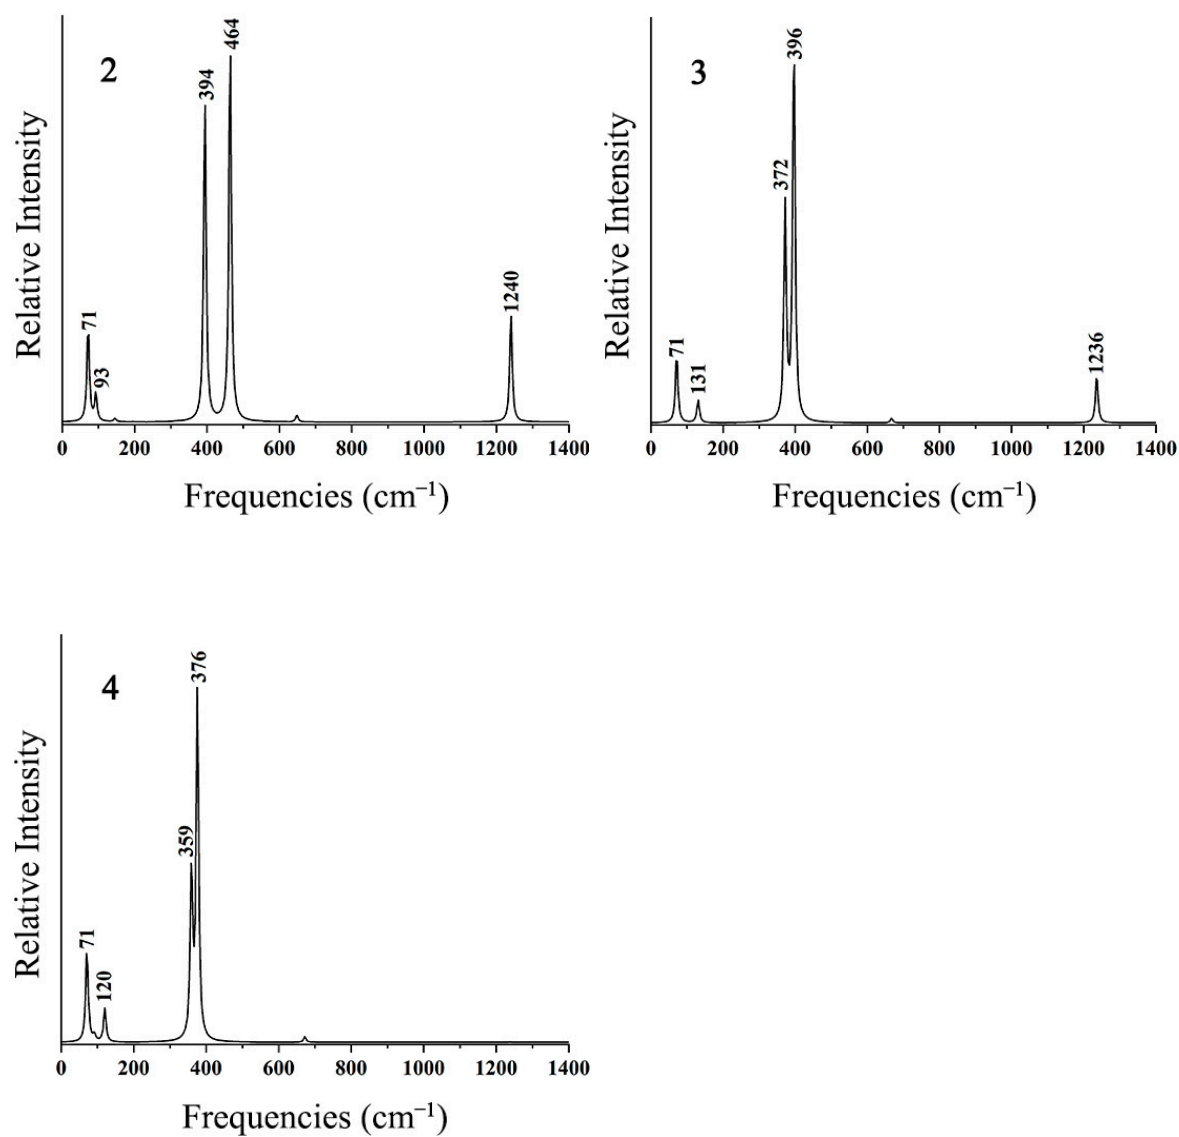

Supplement: s1 [file s1]
